# Supplementary material
Source: PubMed Central journal article supplement (PMC4973209)
Supplement: d-72-00904-sup1.pdf [file d-72-00904-sup1.pdf]

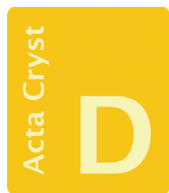

STRUCTURAL  
BIOLOGY

**Volume 72 (2016)**

**Supporting information for article:**

**2.4 Å resolution crystal structure of human TRAP1NM, the Hsp90  
paralogue in the mitochondrial matrix**

**Nuri Sung, Jungsoon Lee, Ji-Hyun Kim, Changsoo Chang, Francis T. F. Tsai  
and Sukyeong Lee**

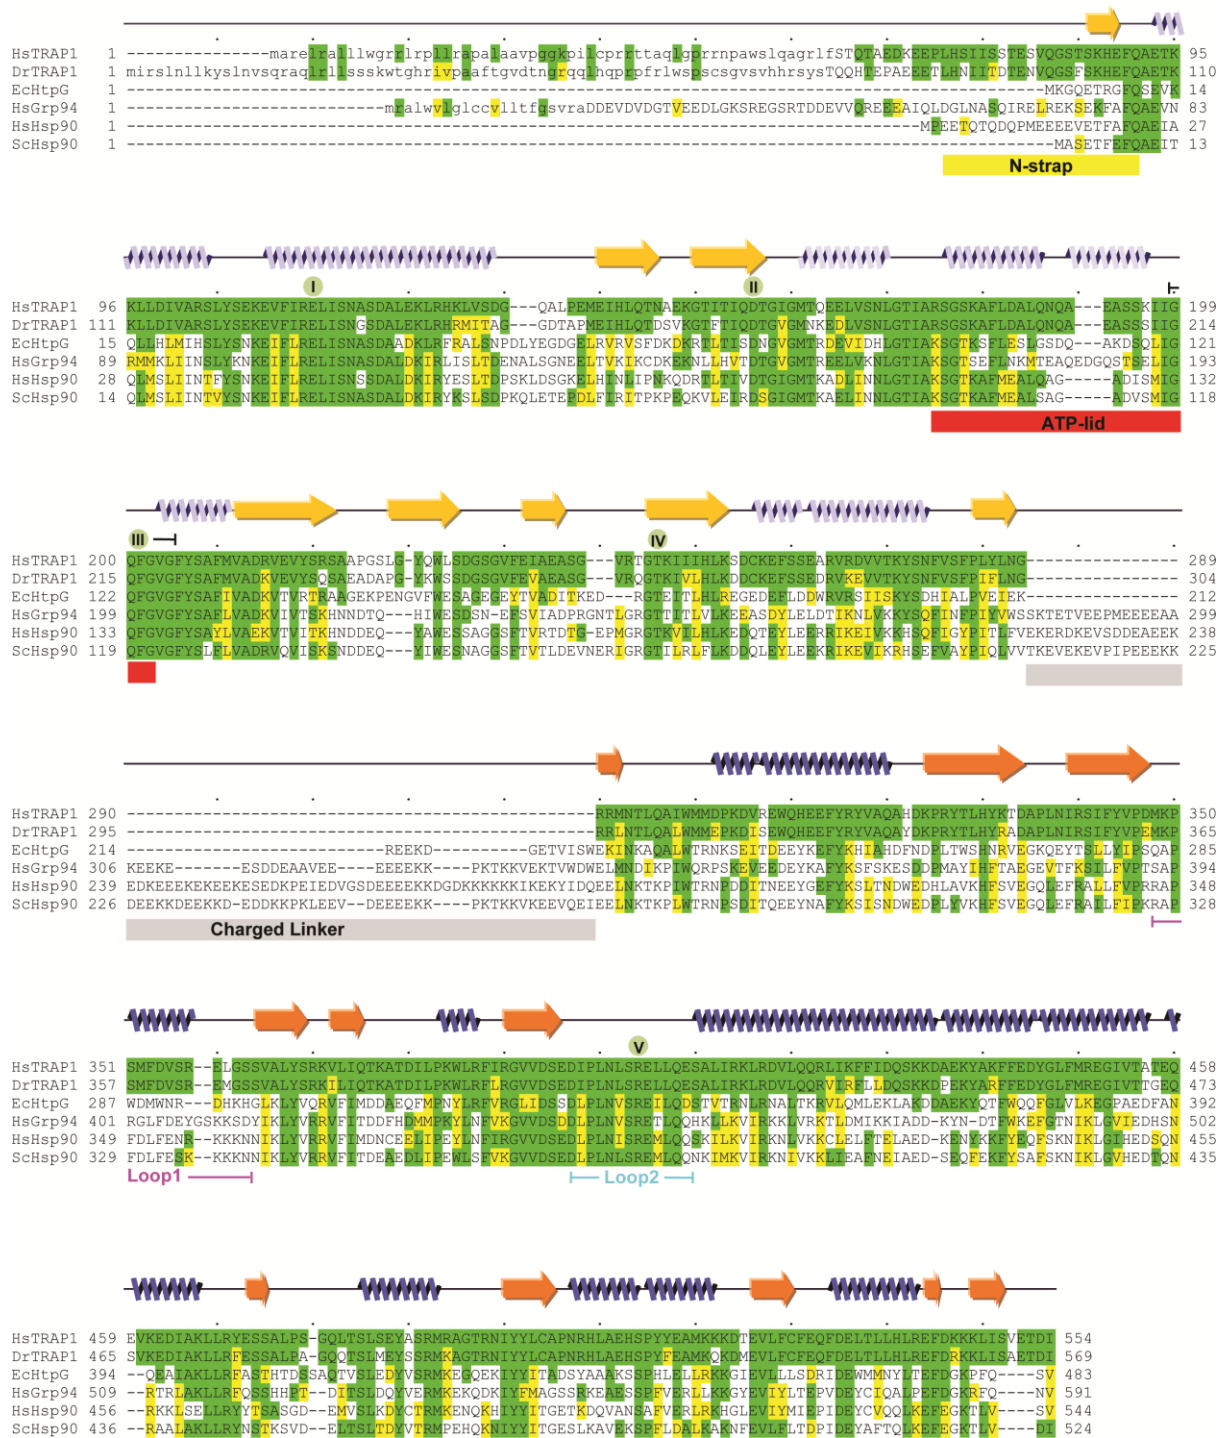

**Figure S1** Multiple sequence alignment of the NM-domain of TRAP1 (mitochondria), HtpG (eubacteria), Hsp90 (human/yeast cytosolic), and Grp94 (endoplasmic reticulum) from *Homo sapiens* (Hs), *Danio rerio* (Dr), *Escherichia coli* (Ec), and *Saccharomyces cerevisiae* (Sc) (UniProt ID: Q12931, A8WFV1, P0A6Z3, P14625, P07900, P02829). Residues conserved across sequences of representative members are highlighted in green and those similar in yellow. Residues not found in the mature protein are shown in lowercase letters. Secondary structure elements are shown as blue cylinders ( $\alpha$ -helix) or orange arrows ( $\beta$ -strand), and those belonging to the N- and M-domain,

respectively, are coloured in different hues. The N-strap, ATP-lid, charged linker, M-domain loops, and motifs I to V are marked.

|   | Mortalin binding spots                                                                                                                                                         | Hsp70 binding spots                                                                                                                                                       |
|---|--------------------------------------------------------------------------------------------------------------------------------------------------------------------------------|---------------------------------------------------------------------------------------------------------------------------------------------------------------------------|
| A | DKEEPLHSIISS <br>EPLHSIISSSTES<br>HSIISSSTESVQG                                               | EEPLHSIISSSTE <br>HSIISSSTESVQG                                                          |
| B | KLLDIVARSLYS <br>DIVARSLYSEKE<br>ARSLYSEKEVFI<br>LYSEKEVFIREL<br>EKEVFIRELISN<br>VFIRELISNASD | KLLDIVARSLYS <br>IVARSLYSEKEV<br>SLYSEKEVFIRE<br>EKEVFIRELISN<br>FIRELISNASDA            |
| C | ASDALEKLRHKL <br>ALEKLRHKLVS<br>KLRHKLVS DGQA                                                 | ASDALEKLRHKL <br>LEKLRHKLVS DG<br>RHKLVS DGQALP                                          |
| D | LVSNLGTIARSG <br>NLGTIARSGSKA<br>TIARSGSKAFD<br>RSGSKAFDALQ<br>SKAFDALQNA<br>FDALQNAEAS       | LVSNLGTIARSG <br>LGTIARSGSKAF<br>ARSGSKAFDAL<br>SKAFDALQNA<br>LDALQNAEASS                |
| E | FGVGFYSAFMVA <br>GFYSAFMVADR<br>SAFMVADRVEVY<br>MVADRVEVYSRS<br>DRVEVYSRSAAP                  | QFGVGFYSAFMV <br>GFYSAFMVADR<br>AFMVADRVEVYS<br>ADRVEVYSRSAA                             |
| F | GVRTGTGKIIHL <br>TGTKIIHLKSD                                                                  | ASGVRTGTGKIII <br>RTGTGKIIHLKS                                                           |
| G | <b>CKEFSSEARVRD</b> <br>FSSEARVRDVVT                                                          | DCKEFSSEARVR <br>FSSEARVRDVVT                                                            |
| H | VRDVVTKYSNFV <br>VVTKYSNFVSP<br>KYSNFVSFPLYL                                                  | ARVRDVVTKYSN <br>DVVTKYSNFVSF<br>KYSNFVSFPLYL                                            |
| I | VREWQHEEFYRY <br>WQHEEFYRYVAQ<br>EEFYRYVAQAHD<br>YRYVAQAHDKPR                                 | KDVREWQHEEFY <br>EWQHEEFYRYVA<br>EEFYRYVAQAHD<br>RYVAQAHDKPRY                            |
| J | AHDKPRYTLHYK <br>KPRYTLHYKTDA<br>YTLHYKTDAPLN                                                 | QAHDKPRYTLHY <br>KPRYTLHYKTDA<br>TLHYKTDAPLNI                                            |
| K | TDAPLNIRSIFY <br>PLNIRSIFYVPD<br>IRSIFYVPMKP                                                 | KTDAPLNIRSIF <br>PLNIRSIFYVPD<br>RSIFYVPMKPS                                            |
| L | <b>SMFDVSRELGSS</b> <br>DVSRELGSSVAL                                                        | MFDVSRELGSSV <br>SRELGSSVALYS                                                          |
| M | GSSVALYSRKVL <br>VALYSRKVLIQT<br>YSRKVLIQTKAT<br>KVLIQTKATDIL                               | GSSVALYSRKVL <br>ALYSRKVLIQTK<br>RKVLIQTKATDI                                          |
| N | KATDILPKWLR <br>DILPKWLRFIRG<br>PKWLRFIRGVVD<br>LRFIRGVVDS                                  | ATDILPKWLRFI <br>LPKWLRFIRGVV<br>LRFIRGVVDS                                           |
| O | SEDIPLNLSREL <br>IPLNLSRELLQE                                                               | DSEDIPLNLSRE <br>IPLNLSRELLQE                                                          |
| P | RELLQESALIRK <br>LQESALIRKLRD<br>SALIRKLRDVLQ                                               | LLQESALIRKLR <br>SALIRKLRDVLQ                                                          |
| Q | LRDVLQQRLIK <br>VLQQRLIKFFID<br>QRLIKFFIDQSK<br>IKFFIDQSKKDA                                | RKLRDVLQQRLI <br>DVLQQRLIKFFI<br>QRLIKFFIDQSK<br>KFFIDQSKKDAE                          |
| R | QSKKDAEKYAKF <br>KDAEKYAKFFED<br>EKYAKFFEDYGL                                               | DQSKKDAEKYAK <br>KDAEKYAKFFED<br>KYAKFFEDYGLF                                          |
| S | AKFFEDYGLFMR <br>FEDYGLFMREGI<br>YGLFMREGIVTA                                               | FFEDYGLFMREG <br>YGLFMREGIVTA                                                          |
| T | EDIAKLLRYESS <br>AKLLRYESSALP<br>LRYESSALPSGQ                                               | VKEDIAKLLRYE <br>IAKLLRYESSAL<br>LRYESSALPSGQ                                          |
| U | SGQLTSLSEYAS <br>LTSLSEYASRMR                                                               | PSGQLTSLSEYAS <br>LTSLSEYASRMR                                                         |
| V | RMRAGTRNIYYL <br>AGTRNIYYLCAP<br>RNIYYLCAPNRH                                               | SRMRAGTRNIYY <br>AGTRNIYYLCAP<br>NIYYLCAPNRHL                                          |
| W | KDTEVLFCEQF <br>VLFCEQFDEL<br>FEQFDELLHL<br>DELLHLREFD<br>LLHLREFDKKLL<br>REFDKKLLISVE      | KDTEVLFCEQF <br>VLFCEQFDEL<br>FEQFDELLHL<br>DELLHLREFD<br>LLHLREFDKKLL<br>REFDKKLLISVE |
| X | KKKLISVETDIV <br>ISVETDIVVDHY                                                               | KKKLISVETDIV <br>ISVETDIVVDHY                                                          |
| Y | SRVTNVKVTLRL <br>NVKVTLRLDTHP                                                               | SRVTNVKVTLRL <br>NVKVTLRLDTHP                                                          |
| Z | GAARHFLRMQQL <br>HFLRMQQLAKTQ                                                               | GAARHFLRMQQL <br>HFLRMQQLAKTQ                                                          |
| a | INPRHALIKKLN <br>HALIKKLNQLRA<br>KKLNQLRASEPG                                               | INPRHALIKKLN <br>HALIKKLNQLRA<br>KKLNQLRASEPG                                          |

**Figure S2** Sequences of TRAP1 peptides recognized by Mortalin (left) or cytosolic Hsp70 (right) are shown together with their corresponding binding spots on each membrane. Mortalin-specific binding peptides are boxed in green (Motif G) or magenta (Motif L)
